# Supplementary material for: Circulating Biomarkers Associated with the Diagnosis and Prognosis of B-Cell Progenitor Acute Lymphoblastic Leukemia
Source: MDPI journal article supplement (doi:10.3390/cancers15164186), 2023-08-20
Supplement: s1 [file s1]

**Table S1: Circulating Biomarkers for BCP-ALL.**

| Marker              | Association           | Blood component | Expression | P                     | Method                                                      | Finding                                                                                                                    | Ref.      |
|---------------------|-----------------------|-----------------|------------|-----------------------|-------------------------------------------------------------|----------------------------------------------------------------------------------------------------------------------------|-----------|
| p53                 | AL                    | Serum           | Up         | <0.05                 | ELISA                                                       | Diagnosis and differentiation between adult ALL and AML.                                                                   | [66]      |
| EGFR                | AL                    | Serum           | Up         | <0.001                | ELISA                                                       |                                                                                                                            |           |
| TNF- $\alpha$       | BCP-ALL               | Plasma          | Up         | 0.024                 | ELISA                                                       | Diagnosis and useful to asses childhood BCP-ALL.                                                                           | [63]      |
|                     | ALL                   | Serum           | Up         | 0                     | ELISA                                                       | Diagnostic and prognostic biomarker in adults with ALL.                                                                    | [3]       |
|                     | BCP-ALL               | Serum           | Up         | >0.05                 | ELISA                                                       | Difference from others hematological disease.                                                                              | [62]      |
| Leptin              | BCP-ALL               | Plasma          | Up         | <0.001                | Flow cytometry                                              | Diagnosis, correlating the disease stage and the responsiveness to chemotherapy or a new target for childhood ALL therapy. | [134]     |
|                     | ALL                   | Serum           | High       | -                     | ELISA                                                       | Prognostic marker, leukemia stratification in adults with ALL and AML.                                                     | [135]     |
| Adiponectin         | ALL                   | Serum           | Low        | -                     | ELISA                                                       | Prognostic marker, leukemia stratification in adults with ALL and AML.                                                     | [135]     |
|                     | BCP-ALL               | Plasma          | Down       | <0.0001               | Flow cytometry                                              | Diagnosis, correlating the disease stage and the responsiveness to chemotherapy or a new target for childhood ALL therapy. | [134]     |
| Resistin            | BCP-ALL               | Plasma          | Up         | <0.001                | Flow cytometry                                              | Diagnosis, correlating the disease stage and the responsiveness to chemotherapy or a new target for childhood ALL therapy. | [134]     |
| Fragment of C3-8137 | ALL                   | Serum           | Up         | 5.35x10 <sup>-5</sup> | Specific antibody                                           | Potential biomarker for diagnosis of pediatric ALL, and distinguish between AML.                                           | [4]       |
| Fragment of C3-8937 | ALL                   | Serum           | Up         | 5.13x10 <sup>-5</sup> | Specific antibody                                           |                                                                                                                            |           |
| C3                  | BCP-ALL               | Serum           | Up         | <0.05                 | Lectin affinity chromatography                              | Candidate biomarker for early diagnosis and response to treatment of childhood BCP-ALL.                                    | [124]     |
| Tyrosine Kinase     | ALL                   | Plasma          | Down       | <0.05                 | Fluorescence spectral                                       | Diagnostic and diffused malignancy indicator of childhood ALL.                                                             | [8]       |
| Thymidine kinase    | BCP-ALL, TCP-ALL, AML | Serum           | Up         | 0.001                 | Two-step indirect immunoassay modified by chemiluminescence | Diagnostic biomarker for B-ALL.                                                                                            | [139,137] |
|                     |                       |                 |            | <0.001                | Immunoassay with specific monoclinal antibody.              | Diagnostic, following up and response to treatment biomarker to ALL.                                                       |           |
| CD44                | BCP-ALL               | Plasma          | Up         | ≤0.01                 | FT-FCM                                                      | Potential diagnosis of adult BCP-ALL and new targets for therapy.                                                          | [49]      |
|                     | ALL                   | Serum           | Up         | <0.01                 | ELISA                                                       | Reliable tumor marker for adult AL and pediatric ALL                                                                       | [140,141] |
| BAFF                | ALL                   | Plasma          | Up         | <0.05                 | ELISA                                                       | Diagnostic and progression marker for childhood ALL                                                                        | [150,151] |
|                     | ALL                   | Serum           | Up         | <0.0001               | ELISA                                                       | Diagnostic and prognostic markers for adult ALL.                                                                           | [94]      |
| APRIL               | ALL                   | Plasma          | Up         | <0.05                 | ELISA                                                       | Diagnostic and progression marker for childhood ALL                                                                        | [150,151] |
|                     | ALL                   | Serum           | Up         | <0.0001               | ELISA                                                       | Diagnostic and prognostic markers for adult ALL.                                                                           | [94]      |

|                                 |         |             |      |                       |                       |                                                                                  |      |
|---------------------------------|---------|-------------|------|-----------------------|-----------------------|----------------------------------------------------------------------------------|------|
| PF4                             | ALL     | Serum       | Down | 1.54x10 <sup>-7</sup> | Specific antibody     | Potential biomarker for diagnosis of pediatric ALL, and distinguish between AML. | [7]  |
| TM                              | ALL     | Plasma      | Up   | <0.001                | ELISA                 | Prognostic marker in childhood ALL.                                              | [99] |
|                                 | ALL     | Plasma      | Up   | 0.0001                | ELISA                 |                                                                                  | [98] |
| vWF                             | ALL     | Plasma      | Up   | <0.001                | ELISA                 | Prognostic marker in childhood ALL.                                              | [99] |
|                                 | ALL     | Plasma      | Up   | 0.025                 | ELISA                 |                                                                                  | [98] |
|                                 | AL      | Plasma      | Up   | 6x10 <sup>-85</sup>   | PEA                   | Clinical prognostic markers and treatment effect of adult AL.                    | [78] |
| Survivin                        | ALL     | Serum       | Up   | 0                     | ELISA                 | Diagnosis and prognostic of adult ALL.                                           | [3]  |
|                                 | BCP-ALL | PBMC        | Up   | <0.0001               | Western Blot          | Potential marker to specify prognosis in childhood BCP-ALL.                      | [70] |
| Tryptophan                      | ALL     | Plasma      | Down | <0.05                 | Fluorescence spectral | Diagnostic and diffused malignancy indicator of childhood ALL.                   | [8]  |
| Coenzyme NADH                   | ALL     | Plasma      | Down | <0.05                 |                       |                                                                                  |      |
| Coenzyme FAD                    | ALL     | Plasma      | Up   | <0.05                 |                       |                                                                                  |      |
| CTAP-III                        | ALL     | Serum       | Down | 7.19x10 <sup>-8</sup> | Specific antibody     | Potential biomarker for diagnosis of pediatric ALL, and distinguish between AML. | [7]  |
| GSTP                            | ALL     | Whole blood | Up   | <0.01                 | PMF                   | Potential diagnostic biomarker and drug target of childhood ALL.                 | [4]  |
| PHB                             | ALL     | Whole blood | Up   | <0.01                 | PMF                   |                                                                                  |      |
| 60S acidic ribosomal protein P0 | ALL     | Whole blood | Down | <0.01                 | PMF                   |                                                                                  |      |
| PNPO                            | ALL     | Whole blood | Down | <0.01                 | PMF                   |                                                                                  |      |
| TPI-1                           | ALL     | Whole blood | Down | <0.05                 | PMF                   |                                                                                  |      |
| PRDX4                           | ALL     | Whole blood | Down | <0.01                 | PMF                   |                                                                                  |      |
| Cytoplasmic actin               | ALL     | Whole blood | Down | <0.01                 | PMF                   |                                                                                  |      |
| Hypothetical protein FLJ26567   | ALL     | Whole blood | Down | <0.01                 | PMF                   |                                                                                  |      |
| ADAM17                          | BCP-ALL | Plasma      | Up   | 8x10 <sup>-5</sup>    | Western blot          | Diagnostic biomarker and develop therapeutic target for adult BCP-ALL.           | [68] |
| ATG3                            | BCP-ALL | Plasma      | Up   | 2x10 <sup>-6</sup>    | Western blot          |                                                                                  |      |
| CD19                            | BCP-ALL | Plasma      | Up   | ≤0.05                 | FT-FCM                | Potential diagnosis of adult BCP-ALL and new targets for therapy                 | [49] |
| CD24                            | BCP-ALL | Plasma      | Up   | ≤0.05                 | FT-FCM                |                                                                                  |      |
| CD29                            | BCP-ALL | Plasma      | Up   | ≤0.01                 | FT-FCM                |                                                                                  |      |
| CD105                           | BCP-ALL | Plasma      | Up   | ≤0.01                 | FT-FCM                |                                                                                  |      |
| CD146                           | BCP-ALL | Plasma      | Up   | <0.05                 | FT-FCM                |                                                                                  |      |
| CD9                             | BCP-ALL | Plasma      | Up   | ≤0.05                 | FT-FCM                |                                                                                  |      |
| CD63                            | BCP-ALL | Plasma      | Up   | ≤0.01                 | FT-FCM                |                                                                                  |      |
| CD81                            | BCP-ALL | Plasma      | Up   | ≤0.05                 | FT-FCM                |                                                                                  |      |
| HLA-DR                          | BCP-ALL | Plasma      | Up   | ≤0.06                 | FT-FCM                |                                                                                  |      |
| Smad7                           | ALL     | Serum       | Up   | <0.01                 | qRT-PCR               | Potential diagnostic marker for childhood ALL                                    | [16] |
| α-enolase                       | BCP-ALL | Serum       | Up   | <0.05                 | ELISA                 | Potential diagnostic, prognostic biomarkers and therapeutical targets.           | [14] |
| Anti-9-0AcSGs                   | ALL     | Serum       | Up   | <0.0001               | ELISA                 | Potential diagnostic biomarker for childhood ALL.                                | [65] |
| TGF-β1                          | ALL     | Serum       | Down | <0.01                 | qRT-PCR               | Potential diagnostic marker for childhood ALL                                    | [16] |

|               |           |             |         |          |                                |                                                                                         |       |
|---------------|-----------|-------------|---------|----------|--------------------------------|-----------------------------------------------------------------------------------------|-------|
| Semaphorin 4D | AML, ALL  | Plasma      | Up      | <0.01    | ELISA                          | Target for leukemia diagnosis and treatment                                             | [105] |
|               | BCP-ALL   | PBMC        | Up      | <0.01    | Western blot                   | Potential biomarker for pediatric BCP-ALL diagnosis and prognosis                       | [106] |
| VEGF          | ALL       | Serum       | Down    | <0.001   | ELISA                          | Predictor of progression of childhood ALL.                                              | [152] |
| sL-selectin   | ALL       | Serum       | Up      | <0.05    | ELISA                          | Diagnostic and detection of relapse of childhood ALL.                                   | [153] |
| BCMA          | ALL       | Plasma      | Up      | <0.05    | ELISA                          | Diagnostic and prognostic markers for adult ALL.                                        | [94]  |
| TACI          | ALL       | Plasma      | Up      | <0.05    | ELISA                          |                                                                                         |       |
| TRAIL         | ALL       | Serum       | Down    | <0.0001  | ELISA                          |                                                                                         |       |
| CLUS          | BCP-ALL   | Plasma      | Down    | <0.01    | Western blot.                  | Potential diagnostic and prognostic biomarker for pediatric -ALL.                       | [110] |
| CERU          | BCP-ALL   | Plasma      | Down    | <0.01    | Western blot.                  |                                                                                         |       |
| APOE          | BCP-ALL   | Plasma      | Down    | <0.01    | Western blot.                  |                                                                                         |       |
| APOA4         | BCP-ALL   | Plasma      | Up      | <0.01    | Western blot.                  |                                                                                         |       |
| APOA1         | BCP-ALL   | Plasma      | Up      | <0.01    | Western blot.                  |                                                                                         |       |
| AMBP          | BCP-ALL   | Plasma      | Up      | <0.01    | Western blot.                  |                                                                                         |       |
| ACTB          | BCP-ALL   | Plasma      | Down    | <0.01    | Western blot.                  |                                                                                         |       |
| AFAM          | BCP-ALL   | Plasma      | Down    | <0.01    | Western blot.                  |                                                                                         |       |
| LRG1          | BCP-ALL   | Serum       | Up      | <0.05    | Lectin affinity chromatography | Candidate biomarker for early diagnosis and response to treatment of childhood BCP-ALL. | [124] |
| CLU           | BCP-ALL   | Serum       | Up      | <0.05    |                                |                                                                                         |       |
| F2            | BCP-ALL   | Serum       | Up      | <0.05    |                                |                                                                                         |       |
| SERPIND1      | BCP-ALL   | Serum       | Up      | <0.05    |                                |                                                                                         |       |
| A2M           | BCP-ALL   | Serum       | Up      | <0.05    |                                |                                                                                         |       |
| SERPINF2      | BCP-ALL   | Serum       | Up      | <0.05    |                                |                                                                                         |       |
| SERPINA1      | BCP-ALL   | Serum       | Up      | <0.05    |                                |                                                                                         |       |
| CFB           | BCP-ALL   | Serum       | Up      | <0.05    |                                |                                                                                         |       |
| ADA           | ALL       | Serum       | Up      | <0.001   | Electrophoresis                | Diagnose childhood ALL and monitor therapies.                                           | [154] |
| ADA1          | ALL       | Serum       | Up      | <0.001   | Electrophoresis                |                                                                                         |       |
| IGF-I         | ALL       | Serum       | Down    | 0.08     | ELISA                          | Support diagnosis and follow-up of children with ALL                                    | [64]  |
| IGF-II        | ALL       | Serum       | Down    | 0.79     | ELISA                          |                                                                                         |       |
| IGFBP-2       | ALL       | Serum       | Up      | 0.22     | ELISA                          |                                                                                         |       |
| IGFBP-3       | ALL       | Serum       | Down    | 0.9      | ELISA                          |                                                                                         |       |
| cKI-67        | ALL       | Plasma      | Up      | <0.001   | ECL                            | Diagnostic, prognostic biomarker in adult ALL.                                          | [126] |
| cCD 33        | ALL, AML  | Plasma      | High    | 0.03*    | IFC                            | Poor prognosis in adult patients with ALL.                                              | [155] |
| CD56          | BCP-ALL   | Whole blood | In vivo | 0.006    | Flow cytometry                 | Poor prognosis in adult BCP-ALL                                                         | [156] |
| CD200         | BCP-ALL   | Whole blood | In vivo | 0.003    | Flow cytometry                 |                                                                                         |       |
| Ca 125        | ALL, ANLL | Serum       | High    | 0.001*** | ELISA                          | Therapeutic response in children with AL.                                               | [127] |
| sI-CAM-1      | ALL       | Serum       | Up      | <0.001   | ELISA                          | Response to treatment and early detection of relapse of childhood ALL.                  | [142] |
| sVCAM         | ALL       | Serum       | Up      | <0.001   | ELISA                          |                                                                                         |       |

|                  |          |             |      |                       |                           |                                                                                                     |           |
|------------------|----------|-------------|------|-----------------------|---------------------------|-----------------------------------------------------------------------------------------------------|-----------|
| sE-selectin      | ALL      | Serum       | Up   | <0.001                | ELISA                     |                                                                                                     |           |
| TNFRS2           | ALL      | Plasma      | Up   | <0.34                 | ELISA                     | Poor prognostic biomarker for ALL.                                                                  | [96]      |
|                  | ALL      | PMNC        | Up   | <0.081                | ELISA                     |                                                                                                     |           |
| TNFRS9           | ALL      | Plasma      | Up   | <0.15                 | ELISA                     |                                                                                                     |           |
|                  | ALL      | PMNC        | Up   | <0.42                 | ELISA                     |                                                                                                     |           |
| SYND1            | AL       | Plasma      | Up   | 7.2x10 <sup>-71</sup> | PEA                       | Clinical prognostic markers and treatment effect of adult AL.                                       | [78]      |
| TNFRSF6B         | AL       | Plasma      | Up   | 2.2x10 <sup>-71</sup> | PEA                       |                                                                                                     |           |
| MPO              | AL       | Plasma      | Up   | 5.9x10 <sup>-50</sup> | PEA                       |                                                                                                     |           |
| VIM              | AL       | Plasma      | Up   | 3.6x10 <sup>-45</sup> | PEA                       |                                                                                                     |           |
| TNF-R1           | AL       | Plasma      | Up   | 1.2x10 <sup>-42</sup> | PEA                       |                                                                                                     |           |
| IL-6             | AL       | Plasma      | Up   | 3.6x10 <sup>-41</sup> | PEA                       |                                                                                                     |           |
| CTSD             | AL       | Plasma      | Up   | 1.6x10 <sup>-40</sup> | PEA                       |                                                                                                     |           |
| ADAM-TS 15       | AL       | Plasma      | Low  | 3.4x10 <sup>-40</sup> | PEA                       |                                                                                                     |           |
| FURIN            | AL       | Plasma      | Up   | 6x10 <sup>-40</sup>   | PEA                       |                                                                                                     |           |
| HSP70            | ALL, AML | Plasma      | Up   | <0.05                 | Electrochemiluminescence  | Potential adverse prognostic biomarker of adult ALL and AML.                                        | [107]     |
| PGRN             | ALL      | Serum       | Up   | CIR:0.008             | ELISA                     | Marker of predictor ALL and target therapy.                                                         | [101]     |
|                  |          |             |      | DFS:0.029             |                           |                                                                                                     |           |
| sFASL            | ALL      | Serum       | Up   | Survival:0.0018       | ELISA                     | Marker associated with favorable response to therapy in childhood ALL.                              | [125]     |
|                  |          |             |      | CRD: 0.0013           |                           |                                                                                                     |           |
| XCL1             | ALL      | Serum       | Up   | 0.01                  | ELISA                     | Marker related with higher survival in adult ALL patients.                                          | [21]      |
| Statin           | ALL      | Whole blood | Up   | 0.05                  | Mab                       | Additional useful marker for prognosis in childhood ALL.                                            | [46]      |
| HSP90            | ALL      | Serum       | Down | 0.192                 | ELISA                     | Marker related to poor response to steroids in children with ALL.                                   | [130]     |
| Proteasome ChT-L | ALL      | Plasma      | Up   | 0.006                 | Fluorogenic peptide assay | Additional marker in monitoring the therapy response in childhood ALL.                              | [132]     |
| AC133            | AL       | Whole blood | Up   | <0.05                 | Flow cytometry            | Prognostic marker to high resistance to chemotherapy and short survival in childhood AL.            | [69]      |
| mR-223-3p        | AL       | Serum       | Up   | 0.0044                | qRT-PCR                   | Diagnostic biomarker of childhood ALL.                                                              | [15]      |
| mRNA Survivin    | BCP-ALL  | Whole blood | Up   | <0.05                 | qRT-PCR                   | Potential diagnostic marker for childhood BCP-ALL.                                                  | [70]      |
| mRNA LEF-1       | BCP-ALL  | Whole blood | Up   | OS: 0.005             | qRT-PCR                   | Adverse prognostic significance for adult BCP-ALL.                                                  | [20]      |
| mRNA-BAFF        | ALL      | PBMC        | UP   | <0.05                 | RT-PCR                    | Diagnostic and progression marker for childhood ALL.                                                | [150]     |
| mRNA-APRIL       | ALL      | PBMC        | UP   | <0.05                 | RT-PCR                    |                                                                                                     |           |
| mRNA-BCMA        | ALL      | PBMC        | UP   | <0.05                 | RT-PCR                    | Diagnostic and progression marker for childhood ALL.                                                | [150,151] |
| mRNA-TACI        | ALL      | PBMC        | UP   | <0.05                 | RT-PCR                    | Diagnostic and progression marker for childhood ALL.                                                |           |
| mRNA Livin       | ALL      | PBMC        | Up   | OS:0.05               | qRT-PCR                   | Potential prognostic marker for childhood ALL.                                                      | [111]     |
| mRNA LRP         | ALL      | PBMC        | Up   | <0.05                 | RT-PCR                    | Marker associated with early response and complete remission state post induction in pediatric ALL. | [157]     |

|             |         |                      |                      |                       |                  |                                                                                    |       |
|-------------|---------|----------------------|----------------------|-----------------------|------------------|------------------------------------------------------------------------------------|-------|
| mRNA HLA-G  | ALL     | PBMC                 | High                 | <0.01                 | RT-PCR           | Prognostic tumor marker and to monitor disease state and improvement in adult ALL. | [71]  |
| mRNA Bcl-2  | ALL     | PBMC                 | Down after induction | <0.001                | qRT-PCR          | Potential prognostic marker and monitor response to treatment for childhood ALL.   | [76]  |
| mRNA MS12   | BCP-ALL | Whole blood          | Up                   | OS: 0.018             | RT-PCR           | Unfavorable prognostic biomarker for adult BCP-ALL.                                | [27]  |
| mRNA CRLF2  | BCP-ALL | Whole blood          | Up                   | OS: 0.0038            | Q-PCR            | Unfavorable prognostic biomarker of long-term outcome for adult BCP-ALL.           | [112] |
| miR-181a    | ALL     | Serum                | Down                 | <0.01                 | qRT-PCR          | Potential diagnostic marker for childhood ALL                                      | [16]  |
| miR-181b    | ALL     | Whole blood          | Up                   | <0.001                | qRT-PCR          | Diagnosis of childhood ALL.                                                        | [158] |
| miR-181c    | ALL     | Whole blood          | Up                   | <0.001                | qRT-PCR          |                                                                                    |       |
| miR-181b-5p | ALL     | Plasma               | Up                   | <0.001                | qRT-PCR and TLDA | Detection of minimal residual leukemia.                                            | [146] |
| miR-196     | ALL     | PBMC                 | Up                   | $5.00 \times 10^{-6}$ | qRT-PCR          | Potential diagnostic biomarker and therapeutic targets for childhood ALL.          | [116] |
| miR-196a    | ALL     | PBMC                 | Down                 | 0.028                 | qRT-PCR          | Diagnostic biomarker of childhood ALL.                                             | [15]  |
| miR-10b     | ALL     | PBMC                 | Up                   | $5.00 \times 10^{-6}$ | qRT-PCR          | Potential diagnostic biomarker and therapeutic targets for childhood ALL.          | [116] |
| miR-15b     | ALL     | PBMC                 | Up                   | $5.00 \times 10^{-6}$ | qRT-PCR          |                                                                                    |       |
| miR-20b     | ALL     | PBMC                 | Down                 | $5.00 \times 10^{-5}$ | qRT-PCR          |                                                                                    |       |
| miR-22      | ALL     | PBMC                 | Down                 | $1.50 \times 10^{-5}$ | qRT-PCR          |                                                                                    |       |
| miR-23a     | ALL     | PBMC                 | Up                   | $5.00 \times 10^{-6}$ | qRT-PCR          |                                                                                    |       |
| miR-25      | ALL     | PBMC                 | Down                 | $4.00 \times 10^{-5}$ | qRT-PCR          |                                                                                    |       |
| miR-29a     | ALL     | PBMC                 | Down                 | $1.00 \times 10^{-5}$ | qRT-PCR          |                                                                                    |       |
| miR-30c     | ALL     | PBMC                 | Down                 | $1.00 \times 10^{-5}$ | qRT-PCR          |                                                                                    |       |
| miR-30e-3p  | ALL     | PBMC                 | Down                 | $5.00 \times 10^{-5}$ | qRT-PCR          |                                                                                    |       |
| miR-100     | ALL     | PBMC                 | Down                 | $4.00 \times 10^{-5}$ | qRT-PCR          |                                                                                    |       |
| miR-100     | ALL     | Whole blood, plasma. | Up                   | <0.001                | qRT-PCR          | Potential biomarker for childhood acute leukemia                                   | [117] |
|             | ALL     | PBMC                 | Up                   | 0.007                 | qRT-PCR          | Diagnostic biomarker of childhood ALL.                                             | [15]  |
|             | ALL     | PBMC                 | Up                   | 0.002                 | qRT-PCR          | Biomarker associated with resistance to vincristine in childhood ALL.              | [118] |
| miR-101     | ALL     | PBMC                 | Down                 | $5.00 \times 10^{-6}$ | qRT-PCR          | Potential diagnostic biomarker and therapeutic targets for childhood ALL.          | [116] |
| miR-126     | ALL     | PBMC                 | Down                 | $6.50 \times 10^{-5}$ | qRT-PCR          | Biomarker associated with resistance to vincristine in childhood ALL.              | [118] |
| miR-126     | ALL     | PBMC                 | Up                   | 0.046                 | qRT-PCR          |                                                                                    |       |
| miR-129     | ALL     | PBMC                 | Up                   | $5.00 \times 10^{-5}$ | qRT-PCR          | Potential diagnostic biomarker and therapeutic targets for childhood ALL.          | [116] |
| miR-133b    | ALL     | PBMC                 | Up                   | $5.00 \times 10^{-6}$ | qRT-PCR          |                                                                                    |       |
| miR-146b    | ALL     | PBMC                 | Down                 | $5.00 \times 10^{-6}$ | qRT-PCR          |                                                                                    |       |
| miR-146a-3p | AL      | Serum                | Down                 | 0.0012                | qRT-PCR          | Early detection of pediatric acute leukemia                                        | [159] |
| miR-146a    | ALL     | PBMC                 | Up                   | <0.0001               | qRT-PCR          | Diagnostic biomarker of childhood ALL.                                             | [15]  |
|             | ALL     | Plasma               | Up                   | <0.001                | qRT-PCR          | Predictive marker for diagnosis and prognosis of adult and pediatric ALL           | [9]   |

|             |         |             |      |                       |                  |                                                                                 |       |
|-------------|---------|-------------|------|-----------------------|------------------|---------------------------------------------------------------------------------|-------|
| miR-155     | ALL     | PBMC        | Up   | $5.00 \times 10^{-6}$ | qRT-PCR          | Potential diagnostic biomarker and therapeutic targets for childhood ALL.       | [116] |
| miR-193b    | ALL     | PBMC        | Down | $5.00 \times 10^{-6}$ | qRT-PCR          |                                                                                 |       |
| miR-216     | ALL     | PBMC        | Down | $2 \times 10^{-5}$    | qRT-PCR          |                                                                                 |       |
| miR-217     | ALL     | PBMC        | Up   | $5.00 \times 10^{-6}$ | qRT-PCR          |                                                                                 |       |
| miR-299-3p  | ALL     | PBMC        | Down | $2.50 \times 10^{-5}$ | qRT-PCR          |                                                                                 |       |
| miR-302b    | ALL     | PBMC        | Up   | $5.00 \times 10^{-6}$ | qRT-PCR          |                                                                                 |       |
| miR-302d    | ALL     | PBMC        | Down | $5.00 \times 10^{-6}$ | qRT-PCR          |                                                                                 |       |
| miR-325     | ALL     | PBMC        | Down | $5.00 \times 10^{-6}$ | qRT-PCR          |                                                                                 |       |
| miR-330     | ALL     | PBMC        | Up   | $5.00 \times 10^{-6}$ | qRT-PCR          |                                                                                 |       |
| miR-362     | ALL     | PBMC        | Up   | $5.00 \times 10^{-6}$ | qRT-PCR          |                                                                                 |       |
| miR-368     | ALL     | PBMC        | Up   | $5.00 \times 10^{-6}$ | qRT-PCR          |                                                                                 |       |
| miR-696-5p  | ALL     | PBMC        | Up   | $4.50 \times 10^{-5}$ | qRT-PCR          |                                                                                 |       |
| miR-374     | ALL     | PBMC        | Down | $5.00 \times 10^{-6}$ | qRT-PCR          |                                                                                 |       |
| miR-425-5p  | ALL     | PBMC        | Up   | $5.00 \times 10^{-6}$ | qRT-PCR          |                                                                                 |       |
| miR-494     | ALL     | PBMC        | Down | $1.00 \times 10^{-5}$ | qRT-PCR          |                                                                                 |       |
| miR-501     | ALL     | PBMC        | Up   | $5.00 \times 10^{-6}$ | qRT-PCR          |                                                                                 |       |
| miR-513     | ALL     | PBMC        | Up   | $2.50 \times 10^{-6}$ | qRT-PCR          |                                                                                 |       |
| miR-514     | ALL     | PBMC        | Down | $5.00 \times 10^{-6}$ | qRT-PCR          |                                                                                 |       |
| miR-515-5p  | ALL     | PBMC        | Down | $1.00 \times 10^{-5}$ | qRT-PCR          |                                                                                 |       |
| miR-517b    | ALL     | PBMC        | Up   | $5.00 \times 10^{-6}$ | qRT-PCR          |                                                                                 |       |
| miR-520     | ALL     | PBMC        | Up   | $5.00 \times 10^{-6}$ | qRT-PCR          |                                                                                 |       |
| miR-532     | ALL     | PBMC        | Down | $7.5 \times 10^{-5}$  | qRT-PCR          |                                                                                 |       |
| miR-576     | ALL     | PBMC        | Up   | $2.5 \times 10^{-7}$  | qRT-PCR          |                                                                                 |       |
| miR-585     | ALL     | PBMC        | Up   | $5.00 \times 10^{-6}$ | qRT-PCR          |                                                                                 |       |
| miR-617     | ALL     | PBMC        | Up   | $2.5 \times 10^{-5}$  | qRT-PCR          |                                                                                 |       |
| miR-645     | ALL     | PBMC        | Up   | $1.5 \times 10^{-5}$  | qRT-PCR          |                                                                                 |       |
| miR-26a     | BCP-ALL | Plasma      | Down | <0.001                | qRT-PCR          | Diagnostic biomarker for BCP-ALL.                                               | [73]  |
| miR-34a     | BCP-ALL | Plasma      | Up   | 0.015                 | qRT-PCR          |                                                                                 |       |
| miR-221     | BCP-ALL | Plasma      | Down | <0.001                | qRT-PCR          |                                                                                 |       |
| miR-222     | BCP-ALL | Plasma      | Up   | 0.004                 | qRT-PCR          |                                                                                 |       |
| miR-99a     | ALL     | Whole blood | Down | <0.001                | qRT-PCR          | Diagnosis of childhood ALL                                                      | [117] |
|             | ALL     | PBMC        | Up   | 0.002                 | qRT-PCR          | Biomarker for predicting prognosis and response to treatment for childhood ALL. | [77]  |
|             | ALL     | PBMC        | Up   | 0.033                 | qRT-PCR          | Biomarker associated with resistance to vincristine in childhood ALL.           | [118] |
| miR-125b-1  | ALL     | Serum       | Up   | <0.0001               | qRT-PCR          | Potential diagnosis marker for childhood ALL                                    | [72]  |
| miR-125b-5p | BCP-ALL | Plasma      | Up   | <0.01                 | qRT-PCR and TLDA | Diagnostic of BCP-ALL and detection of residual leukemia                        | [116] |

|                |              |        |                    |         |                  |                                                                                                                                     |          |
|----------------|--------------|--------|--------------------|---------|------------------|-------------------------------------------------------------------------------------------------------------------------------------|----------|
| miR-125b       | ALL          | PBMC   | Up after induction | <0.001  | qRT-PCR          | Prognostic tumor marker and to monitor disease state and improvement in adult ALL.                                                  | [71]     |
|                | ALL          | PBMC   | Down               | 0.001   | qRT-PCR          | Biomarker for predicting prognosis and response to treatment for childhood ALL.                                                     | [77]     |
|                | ALL          | PBMC   | Up                 | 0.033   | qRT-PCR          | Biomarker associated with resistance to vincristine in childhood ALL.                                                               | [118]    |
| miR-203        | ALL          | Serum  | Down               | <0.0001 | qRT-PCR          | Early detection of pediatric acute leukemia                                                                                         | [159]    |
|                | ALL          | PBMC   | Up                 | 0.041   | qRT-PCR          | Biomarker associated with resistance to vincristine in childhood ALL.                                                               | [118]    |
| miR-142-3p     | AL           | Serum  | Down               | 0.001   | qRT-PCR          | Early detection of pediatric acute leukemia                                                                                         | [159]    |
| miR-223        | BCP-ALL      | Plasma | Down               | <0.001  | qRT-PCR and TLDA | Diagnostic of BCP-ALL and detection of residual leukemia                                                                            | [146,73] |
| miR-511        | BCP-ALL      | Plasma | Up                 | 0.002   | qRT-PCR          | Diagnosis, identification of progression markers and assessment of biological and/or therapeutic targets for patients with BCP-ALL. | [73]     |
| miR-638        | ALL          | Plasma | Up                 | <0.0001 | qRT-PCR          | Detection, prognosis and relapse at diagnosis time                                                                                  | [6]      |
| circRNA-AFF2   | BCP-ALL      | PBMC   | Up                 | 0.029   | qRT-PCR          | Classification, risk stratification and diagnosis of BCP-ALL.                                                                       | [90]     |
| circRNA-IL4R   | BCP-ALL      | PBMC   | Up                 | <0.01   | qRT-PCR          |                                                                                                                                     |          |
| circRNA-ZCCHC7 | BCP-ALL      | PBMC   | Up                 | <0.01   | qRT-PCR          |                                                                                                                                     |          |
| circRNA-AFF3   | BCP-ALL      | PBMC   | Up                 | <0.01   | qRT-PCR          |                                                                                                                                     |          |
| circRNA-PAX5   | BCP-ALL      | PBMC   | Up                 | <0.0001 | qRT-PCR          |                                                                                                                                     |          |
| circRNA-PVT1   | BCP-ALL      | PBMC   | Up                 | 0.0002  | qRT-PCR          |                                                                                                                                     |          |
| circRNA-HIPX3  | BCP-ALL      | PBMC   | Up                 | <0.0001 | qRT-PCR          |                                                                                                                                     |          |
| circRNA-BCL2   | BCP-ALL      | PBMC   | Up                 | 0.0317  | qRT-PCR          |                                                                                                                                     |          |
| circRNA-SETBP1 | MLL, BCP-ALL | PBMC   | Down               | 0.0028  | qRT-PCR          |                                                                                                                                     |          |
| circRNA-X      | MLL-BCP-ALL  | PBMC   | Down               | 0.0472  | qRT-PCR          |                                                                                                                                     |          |
| circRNA-IKZF1  | BCP-ALL      | PBMC   | Down               | 0.0154  | qRT-PCR          |                                                                                                                                     |          |
| miR-21         | ALL          | PBMC   | Up                 | <0.05   | qRT-PCR          | Response to treatment in childhood ALL.                                                                                             | [74,115] |
|                | BCP-ALL      | Serum  | Up                 | <0.001  | qRT-PCR          | Biomarker for risk assessment and unfavorable prognostic in childhood BCP-ALL                                                       | [160]    |
| miR-92a        | ALL          | PBMC   | Up                 | 0.0186  | qRT-PCR          | Prognostic and monitoring adult ALL.                                                                                                | [75]     |
| miR-24         | ALL          | PBMC   | Up                 | <0.05   | qRT-PCR          | Response to treatment, therapeutic target and prognostic marker in childhood ALL.                                                   | [74]     |
| miR-148a       | ALL          | PBMC   | Up                 | <0.01   | qRT-PCR          | Response to treatment in childhood ALL.                                                                                             |          |
| miR-128-3p     | ALL          | Plasma | Up                 | <0.001  | qRT-PCR and TLDA | Detection of minimal residual leukemia.                                                                                             | [146]    |
| miR-128b       | ALL          | PBMC   | Up                 | <0.002  | qRT-PCR          | Biomarker associated with resistance to vincristine in childhood ALL.                                                               | [118]    |
| miR-150        | ALL          | PBMC   | Down               | 0.049   | qRT-PCR          | Potential predictor of clinical outcome of ALL.                                                                                     | [161]    |
| miR-629        | ALL          | PBMC   | Up                 | 0.031   | qRT-PCR          | Biomarker associated with resistance to vincristine in childhood ALL.                                                               | [118]    |
| miR-9          | ALL          | PBMC   | Up                 | 0.032   | qRT-PCR          |                                                                                                                                     |          |
| miR-625        | ALL          | PBMC   | Down               | 0.006   | qRT-PCR          |                                                                                                                                     |          |
| miR-141        | ALL          | PBMC   | Down               | 0.021   | qRT-PCR          |                                                                                                                                     |          |

|                                            |     |        |      |           |                                                               |                                                                                                                       |       |
|--------------------------------------------|-----|--------|------|-----------|---------------------------------------------------------------|-----------------------------------------------------------------------------------------------------------------------|-------|
| miR-200c                                   | ALL | PBMC   | Down | 0.001     | qRT-PCR                                                       |                                                                                                                       |       |
| miR-383                                    | ALL | PBMC   | Up   | 0.037     | qRT-PCR                                                       |                                                                                                                       |       |
| miR-335                                    | ALL | PBMC   | Up   | 0.033     | qRT-PCR                                                       |                                                                                                                       |       |
| miR-454                                    | ALL | PBMC   | Up   | 0.017     | qRT-PCR                                                       |                                                                                                                       |       |
| Mitochondrial DNA                          | ALL | PBMC   | Down | EFS: 0.04 | qRT-PCR                                                       | A marker of poor prognosis of childhood ALL.                                                                          | [119] |
| cf-DNA                                     | ALL | Plasma | Up   | <0.001    | qRT-PCR                                                       | DNA concentrations and mean integrity may be used as biomarker for diagnostic, prognostic and monitoring MDR for ALL. | [50]  |
| Pseudouridine                              | ALL | Serum  | Up   | <0.001    | HPLC                                                          | Diagnostic and prognostic marker of adult ALL.                                                                        | [67]  |
| Phosphorylcholine                          | ALL | Serum  | Up   | <0.05     | Ultra-performance liquid chromatography and mass spectrometry | Potential diagnostic and prognostic biomarker for childhood ALL.                                                      | [17]  |
| LysoPC (16:0)                              | ALL | Serum  | Up   | <0.05     |                                                               |                                                                                                                       |       |
| LysoPC (18:0)                              | ALL | Serum  | Up   | <0.05     |                                                               |                                                                                                                       |       |
| PC(P-18:1(9Z)/0:0)                         | ALL | Serum  | Up   | <0.05     |                                                               |                                                                                                                       |       |
| 3-Decaprenyl-4-hydroxybenzoic acid         | ALL | Serum  | Up   | <0.05     |                                                               |                                                                                                                       |       |
| DG (24:1(15Z)/22:5(4Z,7Z,10Z,13Z,16Z)/0:0) | ALL | Serum  | Up   | <0.05     |                                                               |                                                                                                                       |       |
| LysoPC (18:2(9Z,12Z))                      | ALL | Serum  | Up   | <0.05     |                                                               |                                                                                                                       |       |
| PE(P-19:1(12Z)/0:0)                        | ALL | Serum  | Up   | <0.05     |                                                               |                                                                                                                       |       |
| LysoPC (18:1(11Z))                         | ALL | Serum  | Up   | <0.05     |                                                               |                                                                                                                       |       |
| PC (16:0/0:0) [rac]                        | ALL | Serum  | Up   | <0.05     |                                                               |                                                                                                                       |       |
| PC (18:1(9Z)/18:4(6Z,9Z,12Z,15Z))          | ALL | Serum  | Up   | <0.05     |                                                               |                                                                                                                       |       |
| PI (20:5(5Z,8Z,11Z,14Z,17Z)/15:1(9Z))      | ALL | Serum  | Up   | <0.05     |                                                               |                                                                                                                       |       |
| 11(Z),14(Z)-eicosadienoic Acid             | ALL | Serum  | Up   | <0.05     |                                                               |                                                                                                                       |       |
| PA (22:0/0:0)                              | ALL | Serum  | Up   | <0.05     |                                                               |                                                                                                                       |       |
| PE (14:0/15:0)                             | ALL | Serum  | Up   | <0.05     |                                                               |                                                                                                                       |       |
| PG (20:1(11Z)/0:0)                         | ALL | Serum  | Up   | <0.05     |                                                               |                                                                                                                       |       |
| PG(P-20:0/0:0)                             | ALL | Serum  | Up   | <0.05     |                                                               |                                                                                                                       |       |
| 11(Z),14(Z)-eicosadienoic Acid             | ALL | Serum  | Up   | <0.05     |                                                               |                                                                                                                       |       |
| PA (22:0/0:0)                              | ALL | Serum  | Up   | <0.05     |                                                               |                                                                                                                       |       |
| PE (14:0/15:0)                             | ALL | Serum  | Up   | <0.05     |                                                               |                                                                                                                       |       |
| PG (20:1(11Z)/0:0)                         | ALL | Serum  | Up   | <0.05     |                                                               |                                                                                                                       |       |
| PG(P-20:0/0:0)                             | ALL | Serum  | Up   | <0.05     |                                                               |                                                                                                                       |       |
| LysoPE (0:0/16:0)                          | ALL | Serum  | Down | <0.05     |                                                               |                                                                                                                       |       |
| LysoPE (18:1(11Z)/0:0)                     | ALL | Serum  | Down | <0.05     |                                                               |                                                                                                                       |       |
| LysoPc (15:0)                              | ALL | Serum  | Down | <0.05     |                                                               |                                                                                                                       |       |
| LysoPC (20:5(5Z,8Z,11Z,14Z,17Z))           | ALL | Serum  | Down | <0.05     |                                                               |                                                                                                                       |       |
| LysoPC (22:6(4Z,7Z,10Z,13Z,16Z,19Z))       | ALL | Serum  | Down | <0.05     |                                                               |                                                                                                                       |       |



|                                                                    |         |             |      |        |                      |                                                                                                        |       |
|--------------------------------------------------------------------|---------|-------------|------|--------|----------------------|--------------------------------------------------------------------------------------------------------|-------|
| LysoPC (17:0)                                                      | ALL     | Serum       | Down | <0.05  |                      |                                                                                                        |       |
| LysoPC (22:5(7Z,10Z,13Z,16Z,19Z))                                  | ALL     | Serum       | Down | <0.05  |                      |                                                                                                        |       |
| 8,11-eicosadienoic acid                                            | ALL     | Serum       | Down | <0.05  |                      |                                                                                                        |       |
| Uric acid                                                          | ALL     | Serum       | Down | <0.05  |                      |                                                                                                        |       |
| Chenodeoxycholic acid glycine conjugate                            | ALL     | Serum       | Down | <0.05  |                      |                                                                                                        |       |
| LysoPE (22:4(7Z,10Z,13Z,16Z)/0:0)                                  | ALL     | Serum       | Down | <0.05  |                      |                                                                                                        |       |
| LysoPE (20:4(8Z,11Z,14Z,17Z)/0:0)                                  | ALL     | Serum       | Down | <0.05  |                      |                                                                                                        |       |
| PC (15:0/0:0)                                                      | ALL     | Serum       | Down | <0.05  |                      |                                                                                                        |       |
| Hyaluronic Acid                                                    | BCP-ALL | Serum       | Up   | 0.03   | Latex agglutination. | Potential prognostic biomarker for adult BCP-ALL, on the day before the beginning of the chemotherapy. | [162] |
| SPGT                                                               | ALL     | Serum       | Up   | <0.001 | Spectrometry         | Prognostic significance associated with progression fulminant form of childhood ALL.                   | [163] |
| 2,3-Dinor-6-keto-PGF1a                                             | ALL     | Whole blood | High | <0.01  | Mass spectrometer    | Predict clinical outcome, monitor disease progress of adult ALL.                                       | [93]  |
| GPEtn(16:0/0:0)                                                    | ALL     | Whole blood | Down | <0.01  |                      |                                                                                                        |       |
| GPCho(O-6:0/O-6:0)                                                 | ALL     | Whole blood | High | <0.01  |                      |                                                                                                        |       |
| GPEtn(18:1(9Z)/0:0)                                                | ALL     | Whole blood | Down | <0.01  |                      |                                                                                                        |       |
| Methyl 8-[2-(2-formyl-vinyl)-3-hydroxy-5-oxocyclopentyl]-octanoate | ALL     | Whole blood | High | <0.01  |                      |                                                                                                        |       |
| 1-Tetrahexanoyl-2-(8-[3]-ladderane-octanyl)-sn-GPEtn               | ALL     | Whole blood | Down | <0.01  |                      | Predict clinical outcome, monitor disease progress of adult ALL.                                       |       |

References for this section.

3

Ahmed, M.B.; Shehata, H.H.; Moussa, M.; Ibrahim, T.M. Prognostic significance of survivin and tumor necrosis factor-alpha in adult acute lymphoblastic leukemia. *Clin Biochem* **2012**, *45*, 112-116, doi:10.1016/j.clinbiochem.2011.08.1147.

4

Wang, D.; Lv, Y.Q.; Liu, Y.F.; Du, X.J.; Li, B. Differential protein analysis of lymphocytes between children with acute lymphoblastic leukemia and healthy children. *Leuk Lymphoma* **2013**, *54*, 381-386, doi:10.3109/10428194.2012.713104.

6

Fayed, D.; Donia, T.; El-Shanshory, M.; Ali, E.M.M.; Mohamed, T.M. Evaluation of MicroRNA92, MicroRNA638 in Acute Lymphoblastic Leukemia of Egyptian Children. *Asian Pacific journal of cancer prevention : APJCP* **2021**, *22*, 1567-1572, doi:10.31557/apjcp.2021.22.5.1567.

7

Shi, L.; Zhang, J.; Wu, P.; Feng, K.; Li, J.; Xie, Z.; Xue, P.; Cai, T.; Cui, Z.; Chen, X.; et al. Discovery and identification of potential biomarkers of pediatric acute lymphoblastic leukemia. *Proteome Sci* **2009**, *7*, 7, doi:10.1186/1477-5956-7-7.

8

Masilamani, V.; Devanesan, S.; AlSalhi, M.S.; AlQahtany, F.S.; Farhat, K.H. Fluorescence spectral detection of acute lymphoblastic leukemia (ALL) and acute myeloid leukemia (AML): A novel photodiagnosis strategy. *Photodiagnosis Photodyn Ther* **2020**, *29*, 101634, doi:10.1016/j.pdpdt.2019.101634.

9

Shahid, S.; Shahid, W.; Shaheen, J.; Akhtar, M.W.; Sadaf, S. Circulating miR-146a expression as a non-invasive predictive biomarker for acute lymphoblastic leukemia. *Scientific reports* **2021**, *11*, 22783, doi:10.1038/s41598-021-02257-4.

- 14 Yu, R.; Yang, S.; Liu, Y.; Zhu, Z. Identification and validation of serum autoantibodies in children with B-cell acute lymphoblastic leukemia by serological proteome analysis. *Proteome Sci* **2022**, *20*, 3, doi:10.1186/s12953-021-00184-w.
- 15 Swellam, M.; El-Khazragy, N. Clinical impact of circulating microRNAs as blood-based marker in childhood acute lymphoblastic leukemia. *Tumour Biol* **2016**, *37*, 10571-10576, doi:10.1007/s13277-016-4948-7.
- 16 Nabhan, M.; Louka, M.L.; Khairy, E.; Tash, F.; Ali-Labib, R.; El-Habashy, S. MicroRNA-181a and its target Smad 7 as potential biomarkers for tracking child acute lymphoblastic leukemia. *Gene* **2017**, *628*, 253-258, doi:10.1016/j.gene.2017.07.052.
- 17 Bai, Y.; Zhang, H.; Sun, X.; Sun, C.; Ren, L. Biomarker identification and pathway analysis by serum metabolomics of childhood acute lymphoblastic leukemia. *Clin Chim Acta* **2014**, *436*, 207-216, doi:10.1016/j.cca.2014.05.022.
- 20 Aly, R.M.; Yousef, A.B. Prognostic significance of lymphoid enhancer-binding factor-1 expression in egyptian adult B-acute lymphocytic leukemia patients. *Turk J Haematol* **2015**, *32*, 15-20, doi:10.4274/tjh.2013.0140.
- 21 Gutierrez-Aguirre, C.H.; Flores-Jimenez, J.A.; Alatorre-Ricardo, J.; Cantu-Rodriguez, O.G.; Rosas-Taraco, A.; Salazar-Riojas, R.; Jaime-Perez, J.C.; Sanchez-Cardenas, M.; Lopez-Silva, L.; Martinez-Castilla, A.M.; et al. The prognostic significance of serum XCL1 concentration in patients with acute lymphoblastic leukemia: a pilot study. *Ann Hematol* **2017**, *96*, 2015-2024, doi:10.1007/s00277-017-3142-3.
- 27 Aly, R.M.; Ghazy, H.F. Prognostic significance of MSI2 predicts unfavorable outcome in adult B-acute lymphoblastic leukemia. *Int J Lab Hematol* **2015**, *37*, 272-278, doi:10.1111/ijlh.12284.
- 46 Volm, M.; Hecker, S.; Sauerbrey, A.; Mattern, J. Predictive value of statin, a G0-associated cell cycle protein, in childhood acute lymphoblastic leukemia. *Int J Cancer* **1995**, *64*, 166-170, doi:10.1002/ijc.2910640304.
- 49 Miljkovic-Licina, M.; Arraud, N.; Zahra, A.D.; Ropraz, P.; Matthes, T. Quantification and Phenotypic Characterization of Extracellular Vesicles from Patients with Acute Myeloid and B-Cell Lymphoblastic Leukemia. *Cancers (Basel)* **2021**, *14*, doi:10.3390/cancers14010056.
- 50 Gao, Y.J.; He, Y.J.; Yang, Z.L.; Shao, H.Y.; Zuo, Y.; Bai, Y.; Chen, H.; Chen, X.C.; Qin, F.X.; Tan, S.; et al. Increased integrity of circulating cell-free DNA in plasma of patients with acute leukemia. *Clin Chem Lab Med* **2010**, *48*, 1651-1656, doi:10.1515/CCLM.2010.311.
- 62 Aref, S.; Salama, O.; Shamaa, S.; El-Refaie, M.; Mourkos, H. Angiogenesis factor pattern differs in acute lymphoblastic leukemia and chronic lymphocytic leukemia. *Hematology* **2007**, *12*, 319-324, doi:10.1080/10245330701340759.
- 63 Potapnev, M.P.; Petyovka, N.V.; Belevtsev, M.V.; Savitskiy, V.P.; Migal, N.V. Plasma level of tumor necrosis factor-alpha (TNF-alpha) correlates with leukocytosis and biological features of leukemic cells, but not treatment response of children with acute lymphoblastic leukemia. *Leuk Lymphoma* **2003**, *44*, 1077-1079, doi:10.1080/1042819031000068025.
- 64 Zakhary, N.I.; Boshra, S.A.; El-Sawalhi, M.M.; Fahim, A.T.; Ebeid, E.N. Insulin-like growth factor system in Egyptian children with acute lymphoblastic leukemia. *Genet Test Mol Biomarkers* **2012**, *16*, 1067-1072, doi:10.1089/gtmb.2012.0039.
- 65 Pal, S.; Bandyopadhyay, S.; Chatterjee, M.; Bhattacharya, D.K.; Minto, L.; Hall, A.G.; Mandal, C. Antibodies against 9-O-acetylated sialoglycans: a potent marker to monitor clinical status in childhood acute lymphoblastic leukemia. *Clin Biochem* **2004**, *37*, 395-403, doi:10.1016/j.clinbiochem.2004.01.001.
- 66 Abdel-Aziz, M.M. Clinical significance of serum p53 and epidermal growth factor receptor in patients with acute leukemia. *Asian Pacific journal of cancer prevention : APJCP* **2013**, *14*, 4295-4299, doi:10.7314/apjcp.2013.14.7.4295.
- 67 Pane, F.; Savoia, M.; Fortunato, G.; Camera, A.; Rotoli, B.; Salvatore, F.; Sacchetti, L. Serum pseudouridine in the diagnosis of acute leukaemias and as a novel prognostic indicator in acute lymphoblastic leukaemia. *Clin Biochem* **1993**, *26*, 513-520, doi:10.1016/0009-9120(93)80017-o.
- 68 Zhu, S.; Xing, C.; Li, R.; Cheng, Z.; Deng, M.; Luo, Y.; Li, H.; Zhang, G.; Sheng, Y.; Peng, H.; et al. Proteomic profiling of plasma exosomes from patients with B-cell acute lymphoblastic leukemia. *Scientific reports* **2022**, *12*, 11975, doi:10.1038/s41598-022-16282-4.
- 69 Elgendi, H.M.; Mekawy, M.A.; Abdel Wahab, S.E.; Tawfik, L.M.; Ismail, E.A.; Adly, A.A. AC133 expression in egyptian children with acute leukemia: impact on treatment response and disease outcome. *Journal of pediatric hematology/oncology* **2010**, *32*, 286-293, doi:10.1097/MPH.0b013e3181c80c08.
- 70 Mohammadi, M.; Amirmahani, F.; Goharizi, K.J.; Pakzad, R.; Dolat, H. Evaluating the expression level of Survivin gene in different groups of B-cell acute lymphoblastic leukemia patients of Iran. *Mol Biol Rep* **2019**, *46*, 2679-2684, doi:10.1007/s11033-019-04703-z.
- 71 Alkhoully, N.; Shehata, I.; Ahmed, M.B.; Shehata, H.; Hassan, S.; Ibrahim, T. HLA-G expression in acute lymphoblastic leukemia: a significant prognostic tumor biomarker. *Med Oncol* **2013**, *30*, 460, doi:10.1007/s12032-013-0460-8.
- 72 Swellam, M.; Hashim, M.; Mahmoud, M.S.; Ramadan, A.; Hassan, N.M. Aberrant Expression of Some Circulating miRNAs in Childhood Acute Lymphoblastic Leukemia. *Biochem Genet* **2018**, *56*, 283-294, doi:10.1007/s10528-018-9844-y.
- 73 Luna-Aguirre, C.M.; de la Luz Martinez-Fierro, M.; Mar-Aguilar, F.; Garza-Veloz, I.; Trevino-Alvarado, V.; Rojas-Martinez, A.; Jaime-Perez, J.C.; Malagon-Santiago, G.I.; Gutierrez-Aguirre, C.H.; Gonzalez-Llano, O.; et al. Circulating microRNA expression profile in B-cell acute lymphoblastic leukemia. *Cancer Biomark* **2015**, *15*, 299-310, doi:10.3233/CBM-150465.

74 El-maadawy, E.A.; Bakry, R.M.; Moussa, M.M.; El-Naby, S.; Talaat, R.M.J.C.; Pharmacology, E.; Physiology. Alteration in miRNAs expression in paediatric acute lymphocyticleukaemia: Insight into patients' therapeutic response. **2021**, *48*, 35-43.

75 Ohyashiki, J.H.; Umez, T.; Kobayashi, C.; Hamamura, R.S.; Tanaka, M.; Kuroda, M.; Ohyashiki, K. Impact on cell to plasma ratio of miR-92a in patients with acute leukemia: in vivo assessment of cell to plasma ratio of miR-92a. *BMC research notes* **2010**, *3*, 347, doi:10.1186/1756-0500-3-347.

76 El-Khazragy, N.; Elshimy, A.A.; Hassan, S.S.; Matbouly, S.; Safwat, G.; Zannoun, M.; Riad, R.A. Dysregulation of miR-125b predicts poor response to therapy in pediatric acute lymphoblastic leukemia. *J Cell Biochem* **2018**, doi:10.1002/jcb.28017.

77 Nemes, K.; Csoka, M.; Nagy, N.; Mark, A.; Varadi, Z.; Danko, T.; Kovacs, G.; Kopper, L.; Sebestyen, A. Expression of certain leukemia/lymphoma related microRNAs and its correlation with prognosis in childhood acute lymphoblastic leukemia. *Pathol Oncol Res* **2015**, *21*, 597-604, doi:10.1007/s12253-014-9861-z.

78 Abu Sabaa, A.; Shen, Q.; Lennmyr, E.B.; Enblad, A.P.; Gammelgard, G.; Molin, D.; Hein, A.; Freyhult, E.; Kamali-Moghaddam, M.; Hoglund, M.; et al. Plasma protein biomarker profiling reveals major differences between acute leukaemia, lymphoma patients and controls. *N Biotechnol* **2022**, *71*, 21-29, doi:10.1016/j.nbt.2022.06.005.

90 Gaffo, E.; Boldrin, E.; Dal Molin, A.; Bresolin, S.; Bonizzato, A.; Trentin, L.; Frasson, C.; Debatin, K.-M.; Meyer, L.H.; te Kronnie, G.; et al. Circular RNA differential expression in blood cell populations and exploration of circRNA deregulation in pediatric acute lymphoblastic leukemia. *Scientific reports* **2019**, *9*, 14670, doi:10.1038/s41598-019-50864-z.

93 Bannur, Z.; Teh, L.K.; Hennesy, T.; Rosli, W.R.; Mohamad, N.; Nasir, A.; Ankathil, R.; Zakaria, Z.A.; Baba, A.; Salleh, M.Z. The differential metabolite profiles of acute lymphoblastic leukaemic patients treated with 6-mercaptopurine using untargeted metabolomics approach. *Clin Biochem* **2014**, *47*, 427-431, doi:10.1016/j.clinbiochem.2014.02.013.

94 Bolkun, L.; Lemancewicz, D.; Jablonska, E.; Szumowska, A.; Bolkun-Skornicka, U.; Moniuszko, M.; Dzieciol, J.; Kloczko, J. Prognostic significance of ligands belonging to tumour necrosis factor superfamily in acute lymphoblastic leukaemia. *Leuk Res* **2015**, *39*, 290-295, doi:10.1016/j.leukres.2014.12.012.

96 El Kramani, N.; Elsherbiny, N.M.; El-Gayar, A.M.; Ebrahim, M.A.; Al-Gayyar, M.M.H. Clinical significance of the TNF-alpha receptors, TNFRSF2 and TNFRSF9, on cell migration molecules Fascin-1 and Versican in acute leukemia. *Cytokine* **2018**, *111*, 523-529, doi:10.1016/j.cyto.2018.05.025.

98 Hatzipantelis, E.S.; Athanassiou-Metaxa, M.; Gombakis, N.; Tzimouli, V.; Taparkou, A.; Sidi-Fragandrea, V.; Garipidou, V.; Papageorgiou, T.; Kleta, D.; Koliouskas, D.E.; et al. Thrombomodulin and von Willebrand factor: relation to endothelial dysfunction and disease outcome in children with acute lymphoblastic leukemia. *Acta Haematol* **2011**, *125*, 130-135, doi:10.1159/000322120.

99 Hagag, A.A.; Abdel-Lateef, A.E.; Aly, R. Prognostic value of plasma levels of thrombomodulin and von Willebrand factor in Egyptian children with acute lymphoblastic leukemia. *J Oncol Pharm Pract* **2014**, *20*, 356-361, doi:10.1177/1078155213508439.

101 El-Ghammaz, A.M.S.; Azzazi, M.O.; Mostafa, N.; Hegab, H.M.; Mahmoud, A.A. Prognostic significance of serum progranulin level in de novo adult acute lymphoblastic leukemia patients. *Clin Exp Med* **2020**, *20*, 269-276, doi:10.1007/s10238-020-00610-x.

105 Jiang, H.; Tang, J.; Qiu, L.; Zhang, Z.; Shi, S.; Xue, L.; Kui, L.; Huang, T.; Nan, W.; Zhou, B.; et al. Semaphorin 4D is a potential biomarker in pediatric leukemia and promotes leukemogenesis by activating PI3K/AKT and ERK signaling pathways. *Oncol Rep* **2021**, *45*, doi:10.3892/or.2021.7952.

106 Xue, L.; Shi, S.; Lei, H.; Zhang, Z.; Tian, X.; Qiu, L.; Tang, J.; Kui, L.; Nan, W.; Cao, X.; et al. Soluble Sema4D Level Is Positively Correlated with Sema4D Expression in PBMCs and Peripheral Blast Number in Acute Leukemia. *Dis Markers* **2022**, *2022*, 1384471, doi:10.1155/2022/1384471.

107 Yeh, C.H.; Tseng, R.; Hannah, A.; Estrov, Z.; Estey, E.; Kantarjian, H.; Albitar, M. Clinical correlation of circulating heat shock protein 70 in acute leukemia. *Leuk Res* **2010**, *34*, 605-609, doi:10.1016/j.leukres.2009.09.014.

110 Braoudaki, M.; Lambrou, G.I.; Vougas, K.; Karamolegou, K.; Tsangaris, G.T.; Tzortzatou-Stathopoulou, F. Protein biomarkers distinguish between high- and low-risk pediatric acute lymphoblastic leukemia in a tissue specific manner. *J Hematol Oncol* **2013**, *6*, 52, doi:10.1186/1756-8722-6-52.

111 Ibrahim, L.; Aladle, D.; Mansour, A.; Hammad, A.; Al Wakeel, A.A.; Abd El-Hameed, S.A. Expression and prognostic significance of livin/BIRC7 in childhood acute lymphoblastic leukemia. *Med Oncol* **2014**, *31*, 941, doi:10.1007/s12032-014-0941-4.

112 Chiaretti, S.; Brugnoletti, F.; Messina, M.; Paoloni, F.; Fedullo, A.L.; Piciocchi, A.; Elia, L.; Vitale, A.; Mauro, E.; Ferrara, F.; et al. CRLF2 overexpression identifies an unfavourable subgroup of adult B-cell precursor acute lymphoblastic leukemia lacking recurrent genetic abnormalities. *Leuk Res* **2016**, *41*, 36-42, doi:10.1016/j.leukres.2015.11.018.

115 Akpınar, F.; Polat, A.; Balci, Y.I.; Akça, H.; Şenol, H.; Tokgun, O. Microrna expression profiles and changes with treatment on childhood leukemias. **2020**.

116 Ramani, R.; Megason, G.; Schallheim, J.; Karlson, C.; Vijayakumar, V.; Vijayakumar, S.; Hicks, C. Integrative Analysis of MicroRNA-Mediated Gene Signatures and Pathways Modulating White Blood Cell Count in Childhood Acute Lymphoblastic Leukemia. *Biomark Insights* **2017**, *12*, 1177271917702895, doi:10.1177/1177271917702895.

117 Xue, Y.; Yang, X.; Hu, S.; Kang, M.; Chen, J.; Fang, Y. A genetic variant in miR-100 is a protective factor of childhood acute lymphoblastic leukemia. *Cancer medicine* **2019**, *8*, 2553-2560, doi:10.1002/cam4.2082.

118 Schotte, D.; De Menezes, R.X.; Akbari Moqadam, F.; Khankahdani, L.M.; Lange-Turenhout, E.; Chen, C.; Pieters, R.; Den Boer, M.L. MicroRNA characterize genetic diversity and drug resistance in pediatric acute lymphoblastic leukemia. *Haematologica* **2011**, *96*, 703-711, doi:10.3324/haematol.2010.026138.

119 Jain, A.; Bakhshi, S.; Thakkar, H.; Gerards, M.; Singh, A. Elevated mitochondrial DNA copy numbers in pediatric acute lymphoblastic leukemia: A potential biomarker for predicting inferior survival. *Pediatr Blood Cancer* **2018**, *65*, doi:10.1002/pbc.26874.

124 Cavalcante Mde, S.; Torres-Romero, J.C.; Lobo, M.D.; Moreno, F.B.; Bezerra, L.P.; Lima, D.S.; Matos, J.C.; Moreira Rde, A.; Monteiro-Moreira, A.C. A panel of glycoproteins as candidate biomarkers for early diagnosis and treatment evaluation of B-cell acute lymphoblastic leukemia. *Biomark Res* **2016**, *4*, 1, doi:10.1186/s40364-016-0055-6.

125 Fathi, M.; Amirghofran, Z.; Shahriari, M. Soluble Fas and Fas ligand and prognosis in children with acute lymphoblastic leukemia. *Med Oncol* **2012**, *29*, 2046-2052, doi:10.1007/s12032-011-9965-1.

126 Bruey, J.M.; Kantarjian, H.; Estrov, Z.; Zhang, Z.; Ma, W.; Albitar, F.; Abdool, A.; Thomas, D.; Yeh, C.; O'Brien, S.; et al. Circulating Ki-67 protein in plasma as a biomarker and prognostic indicator of acute lymphoblastic leukemia. *Leuk Res* **2010**, *34*, 173-176, doi:10.1016/j.leukres.2009.07.030.

127 Birgen, D.; Ertem, U.; Duru, F.; Sahin, G.; Yuksek, N.; Bozkurt, C.; Karacan, C.D.; Aksoy, C. Serum Ca 125 levels in children with acute leukemia and lymphoma. *Leuk Lymphoma* **2005**, *46*, 1177-1181, doi:10.1080/10428190500096690.

130 Pawlik-Gwozdecka, D.; Gorska-Ponikowska, M.; Adamkiewicz-Drozynska, E.; Niedzwiecki, M. Serum heat shock protein 90 as a future predictive biomarker in childhood acute lymphoblastic leukemia. *Cent Eur J Immunol* **2021**, *46*, 63-67, doi:10.5114/ceji.2020.95114.

132 Krawczuk-Rybak, M.; Leszczynska, E.; Malinowska, I.; Matysiak, M.; Ostrowska, H. Proteasome chymotrypsin-like activity in plasma as a useful marker for children with acute lymphoblastic leukemia. *Scand J Clin Lab Invest* **2012**, *72*, 67-72, doi:10.3109/00365513.2011.634021.

134 Moschovi, M.; Trimis, G.; Vounatsou, M.; Katsibardi, K.; Margeli, A.; Damianos, A.; Chrousos, G.; Papassotiriou, I. Serial plasma concentrations of adiponectin, leptin, and resistin during therapy in children with acute lymphoblastic leukemia. *Journal of pediatric hematology/oncology* **2010**, *32*, e8-13, doi:10.1097/MPH.0b013e3181b8a50c.

135 Aref, S.; Ibrahim, L.; Azmy, E.; Al Ashary, R. Impact of serum adiponectin and leptin levels in acute leukemia. *Hematology* **2013**, *18*, 198-203, doi:10.1179/1607845412y.0000000059.

137 O'Neill, K.L.; Zhang, F.; Li, H.; Fuja, D.G.; Murray, B.K. Thymidine kinase 1--a prognostic and diagnostic indicator in ALL and AML patients. *Leukemia* **2007**, *21*, 560-563, doi:10.1038/sj.leu.2404536.

139 Lopez-Martinez, B.; Vilchis Ordonez, A.; Salazar Garcia, M.; Klunder-Klunder, M.; Parra-Ortega, I.; Dorantes-Acosta, E.; Angeles-Florianio, T. Thymidine Kinase: A Biomarker for Recently Diagnosed Acute Leukemia in Pediatric Patients According to the Cell Line Involved. *Arch Med Res* **2015**, *46*, 630-634, doi:10.1016/j.arcmed.2015.11.005.

140 Yokota, A.; Ishii, G.; Sugaya, Y.; Nishimura, M.; Saito, Y.; Harigaya, K. Potential use of serum CD44 as an indicator of tumour progression in acute leukemia. *Hematological oncology* **1999**, *17*, 161-168, doi:10.1002/(sici)1099-1069(199912)17:4<161::aid-hon646>3.0.co;2-y.

141 Takeuchi, M.; Tanizawa, A.; Fukumoto, Y.; Kikawa, Y.; Mayumi, M. Serum soluble CD44 in pediatric patients with acute leukemia. *Journal of pediatric hematology/oncology* **1999**, *21*, 384-388, doi:10.1097/00043426-199909000-00009.

142 Hatzistilianou, M.; Athanassiadou, F.; Agguridaki, C.; Catriu, D. Circulating soluble adhesion molecule levels in children with acute lymphoblastic leukaemia. *Eur J Pediatr* **1997**, *156*, 537-540, doi:10.1007/s004310050657.

146 Rzepiel, A.; Kutszegi, N.; Gezsi, A.; Sagi, J.C.; Egyed, B.; Peter, G.; Butz, H.; Nyiro, G.; Muller, J.; Kovacs, G.T.; et al. Circulating microRNAs as minimal residual disease biomarkers in childhood acute lymphoblastic leukemia. *J Transl Med* **2019**, *17*, 372, doi:10.1186/s12967-019-2114-x.

150 Sun, B.; Li, L.; Xu, M.; Wang, X.; Wang, F.; Ni, H. Significance of BAFF/APRIL Expression and Their Receptors in Pediatric Patients With Acute Lymphoblastic Leukemia. *Journal of pediatric hematology/oncology* **2016**, *38*, 167-172, doi:10.1097/mpb.0000000000000549.

151 Sun, B.; Wu, Y.; Wu, L.; Cui, M.; Ni, H.; Yang, Z.; Xu, M.; Wang, H. Raised expression of APRIL in Chinese children with acute lymphoblastic leukemia and its clinical implications. *Journal of pediatric hematology/oncology* **2014**, *36*, 276-280, doi:10.1097/MPH.0b013e31829f3271.

152 Meena, R.; Nangia, A.; Sharma, S.; Chandra, J. Serum Levels of Vascular Endothelial Growth Factor and Its Receptor in Newly Diagnosed Paediatric Acute Lymphoblastic Leukemia. *Indian J Hematol Blood Transfus* **2021**, *37*, 586-592, doi:10.1007/s12288-021-01413-0.

153 Olejnik, I. Serum soluble L-selectin in childhood acute lymphoblastic leukemia. *Pediatr Int* **1999**, *41*, 246-248, doi:10.1046/j.1442-200x.1999.01062.x.

154 Ebrahimi-Rad, M.; Khatami, S.; Ansari, S.; Jalylfar, S.; Valadbeigi, S.; Saghiri, R. Adenosine Deaminase 1 as a Biomarker for Diagnosis and Monitoring of Patients with Acute Lymphoblastic Leukemia. *J Med Biochem* **2018**, *37*, 128-133, doi:10.1515/jomb-2017-0042.

155 Abdool, A.; Yeh, C.H.; Kantarjian, H.; O'Brien, S.; Bruey, J.; Giles, F.; Albitar, M. Circulating CD33 and its clinical value in acute leukemia. *Exp Hematol* **2010**, *38*, 462-471, doi:10.1016/j.exphem.2010.03.016.

156 Aref, S.; Azmy, E.; El-Bakry, K.; Ibrahim, L.; Mabed, M. Prognostic impact of CD200 and CD56 expression in adult acute lymphoblastic leukemia patients. *Hematology* **2018**, *23*, 263-270, doi:10.1080/10245332.2017.1404276.

157 Bhatia, P.; Masih, S.; Varma, N.; Bansal, D.; Trehan, A. High Expression of Lung Resistance Protein mRNA at Diagnosis Predicts Poor Early Response to Induction Chemotherapy in Childhood Acute Lymphoblastic Leukemia. *Asian Pacific journal of cancer prevention : APJCP* **2015**, *16*, 6663-6668, doi:10.7314/apjcp.2015.16.15.6663.

- 158 Duyu, M.; Durmaz, B.; Gunduz, C.; Vergin, C.; Yilmaz Karapinar, D.; Aksoylar, S.; Kavakli, K.; Cetingul, N.; Irken, G.; Yaman, Y.; et al. Prospective evaluation of whole genome microRNA expression  
profiling in childhood acute lymphoblastic leukemia. *Biomed Res Int* **2014**, *2014*, 967585, doi:10.1155/2014/967585.
- 159 Al Nakeeb, R.H.; Alrubaye, D.J.I.J.o.S. The Expression of Different Micrornas in Iraqi Patients with Childhood Acute Leukemia and Their Association to C/EBP-Î’Serum Level. **2020**, 2879-2887.
- 160 Labib, H.A.; Elantouny, N.G.; Ibrahim, N.F.; Alnagar, A.A. Upregulation of microRNA-21 is a poor prognostic marker in patients with childhood B cell acute lymphoblastic leukemia. *Hematology* **2017**, *22*,  
392-397, doi:10.1080/10245332.2017.1292204.
- 161 Asnafi, A.A.; Khodadi, E.; Golchin, N.; Alghasi, A.; Tavakolifar, Y.; Saki, N.J.F.i.B. Association between microRNA-21, microRNA-150, and micro-RNA-451 expression and clinical outcome of patients with  
acute lymphoblastic leukemia. **2017**, *12*, 63-70.
- 162 Anagnostopoulou, E.; Papanastasopoulou, C.; Papastamataki, M.; Kotsiou, A.; Topouzoglou, Z.; Anagnostopoulos, N.; Sitaras, N. Serum Hyaluronic Acid Levels Are Altered in Acute Leukemia Patients:  
Potential Prognostic Implications. *Acta Haematol* **2017**, *138*, 44-51, doi:10.1159/000477574.
- 163 Rautonen, J.; Siimes, M.A.J.C. Elevated serum transaminase activity at diagnosis is associated with rapidly progressing disease in children with acute lymphoblastic leukemia. **1988**, *61*, 754-757.
